# Supplementary material
Source: bioRxiv or medRxiv preprint supplement (http://medrxiv.stage.highwire.org/highwire/filestream/96667/field_highwire_adjunct_files/8/2020.09.12.20193391-6.pdf)

## Comorbidities by Phenotype

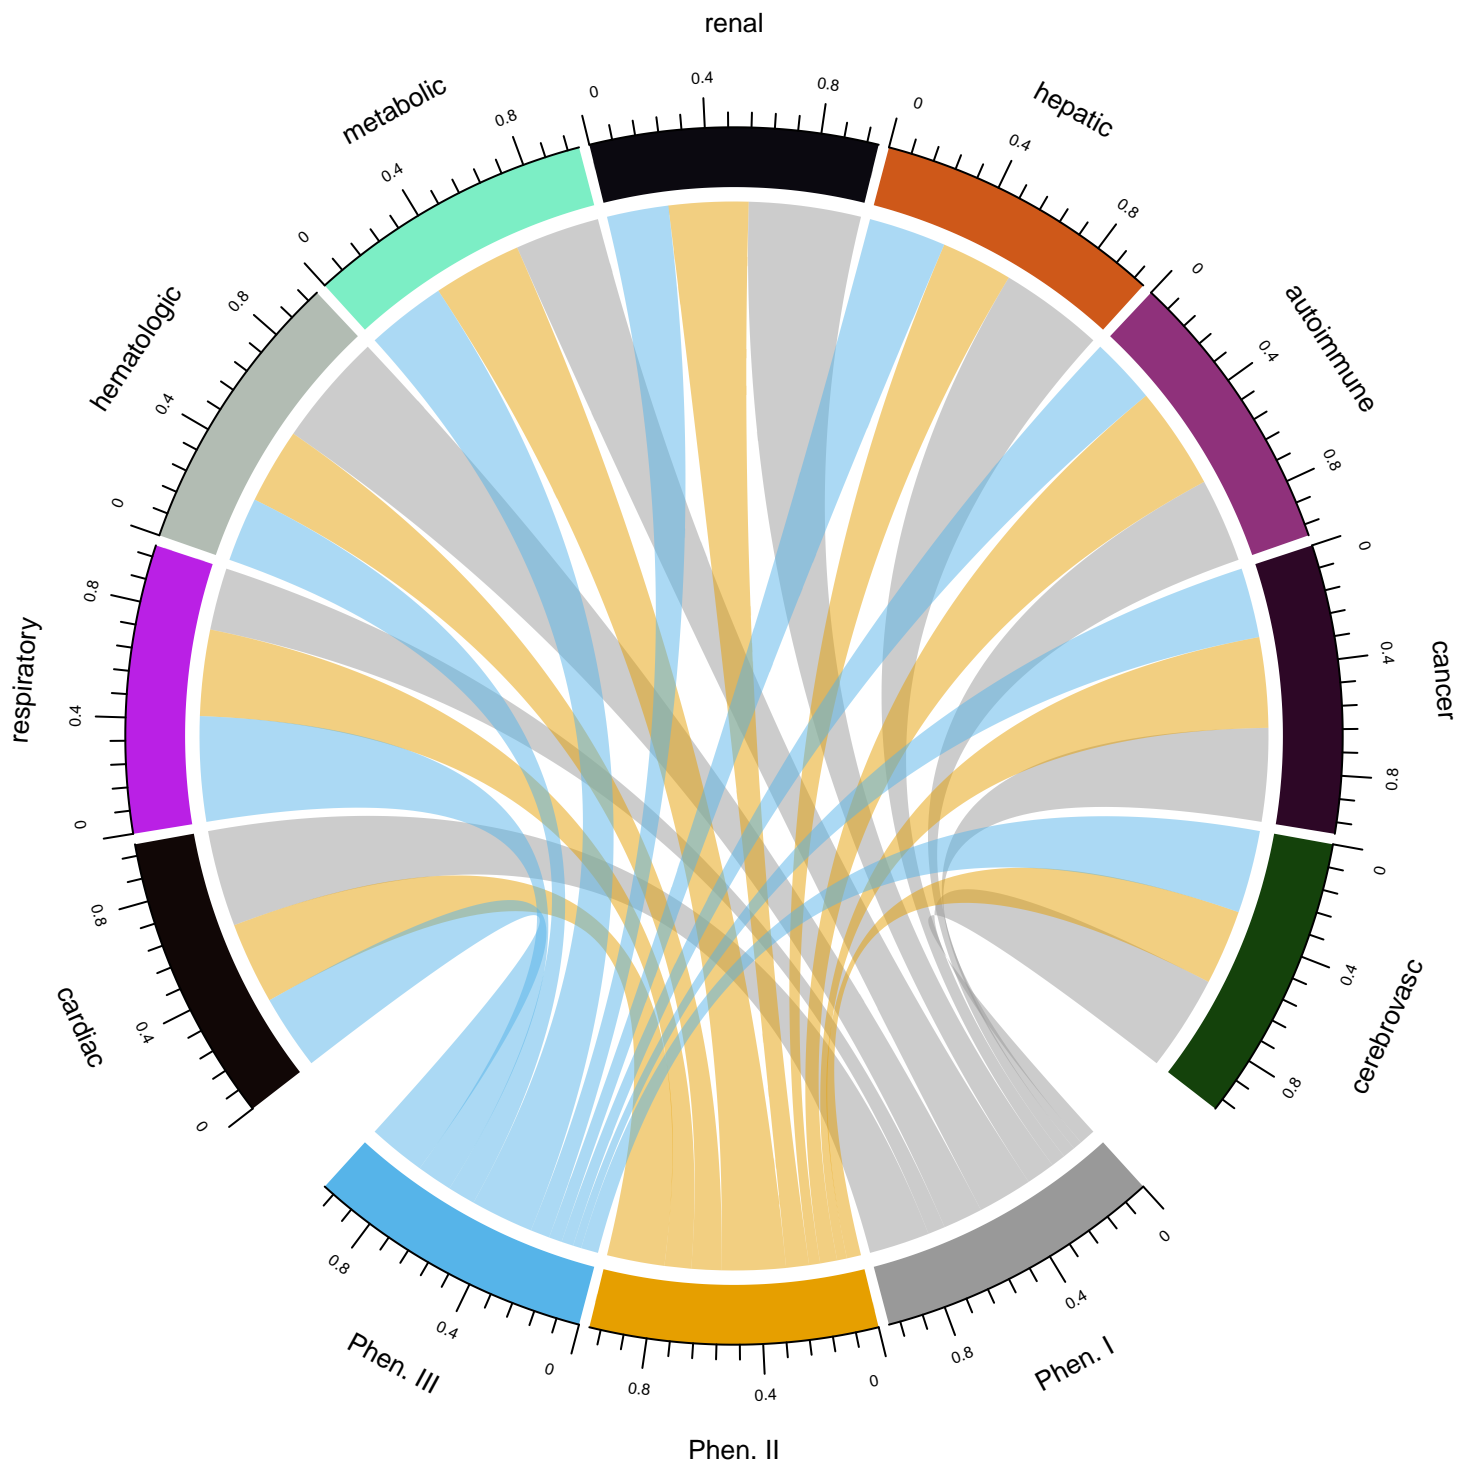

Supplement: Supplementary file [file 2020.09.12.20193391-6.pdf]
